# Supplementary material for: Facile Fabrication of Three-Dimensional Hydrogel Film with Complex Tissue Morphology
Source: MDPI journal article supplement (doi:10.3390/bioengineering8110164), 2021-10-27
Supplement: s1 [file s1]

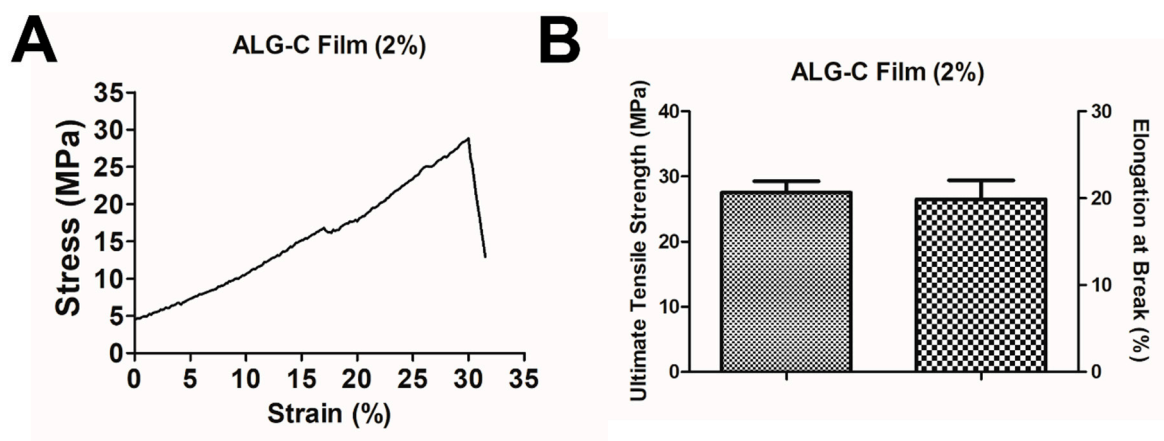

Supplementary Figure S1. Tensile test of ALG-C film. (A) Stress-strain curve of ALG-C film. (B) Evaluation of ultimate tensile strength and elongation at break. All trials were performed in triplicate.
